# Supplementary material for: A data-driven approach to establishing cell motility patterns as predictors of macrophage subtypes and their relation to cell morphology
Source: PubMed Central journal article supplement (PMC11687909; doi:10.1371/journal.pone.0315023), 2024-12-31
Supplement: pone.0315023.s008.pdf [file pone.0315023.s008.pdf]

# 1 **Supporting information**

## 2 **Generation and characterization of primary murine macrophages**

### 3 **Macrophage phagocytosis assay**

4 Phagocytosis is a major function of macrophages to capture and kill pathogens, as well as to  
5 remove apoptotic cells or cell debris (45). We confirm the phagocytic capacity of the naive  
6 BMDMs and LPS or IL-4 primed M1 or M2 macrophages by challenging them with  
7 fluorescently labelled latex beads (**Fig. S1B**). While polarized M1 and M2 macrophages were  
8 both found to have enhanced phagocytic capacity, it is worth noting that the M1 macrophage that  
9 were primed by pathogenic bacterial LPS had a significantly higher number of internalized latex  
10 beads ( $1.624 \pm 0.070$ , bead/cell) when compared with M0 macrophages or M2 macrophages  
11 primed by IL-4 ( $0.811 \pm 0.057$  and  $0.979 \pm 0.072$ , respectively) (**Fig. S1C**), as has also been  
12 reported by other groups (46).

13  
14 BMDMs were seeded on 12 mm cover slips that were pre-coated with FNC Coating Mix  
15 (Athena, Cat number: 0407) for 4 hours at RT in 24-well plate ( $2 \times 10^5$  cells per well) and  
16 cultured in RPMI-1640 (Invitrogen) with 10% Fetal Bovine Serum (Invitrogen) and  $1 \times$   
17 Antibiotic-Antimycotic solution (Invitrogen) for overnight. Macrophages were activated by  
18 following procedures as described above. Fluorescently labeled microspheres (ThermoFisher,  
19 Cat number: F8821) were used to challenge macrophages at a multiplicity of infection of 20 (20  
20 beads per cell). After 60 min of incubation, cells were gently washed  $3 \times$  with PBS to remove  
21 excessive and un-adherent beads, and further incubated in culture media in the absence (for M0)  
22 or presence of LPS (for M1) or IL-4 (for M2) for additional 16 h. To quantify phagocytosis,  
23 macrophages were fixed with 4% paraformaldehyde and permeabilized with 0.1% Tryton-X100  
24 in PBS. F-actin were labelled by FITC-conjugated Phalloidin (Sigma, Cat number: P5282).  
25 Nuclei were labeled by Hoechst 33342 (Sigma, Cat number: 94403). Cells were photographed  
26 using a Leica TCS SP8 confocal microscope (Leica microsystem). Images were processed using  
27 ImageJ. Quantification and comparison of fluorescent intensity were done in images taken in the

28 same batch with the same optical setup and parameters. Beads and nuclei were identified by  
29 thresholding and counted using particle analysis function.

## 30 **Quantitative real-time PCR**

31 To further characterize the phenotype of polarized macrophages, we performed quantitative PCR  
32 to determine the relative mRNA expression of a panel of selected target genes and transcription  
33 factors.

34 Total RNAs were isolated from naïve M0, LPS-simulated M1 or IL-4-stimulated M2  
35 macrophages using the Trizol- (Life Technologies Cat # 15596026) chloroform method,  
36 followed by RNeasy Mini Kit (Qiagen). cDNA was synthesized by QuantiTect Reverse  
37 Transcription Kit (Qiagen). qRT-PCRs were performed on the ViiA 7 Real-Time PCR System  
38 (Applied Biosystems) using PowerUp SYBR Green Master Mix (ThermoFisher) according to the  
39 manufacturer's instructions. Primer sequences are listed in **S2 Table**. Relative expression values  
40 were normalized by internal housekeeping genes (GAPDHs). Fold changes were calculated as  
41 ratios of M2 *versus* M1 macrophages.

42 **S1 Fig. (D)** shows typical profiles and variations of macrophage polarization-associated genes of  
43 unpolarized and differentially polarized macrophages by LPS or IL-4 for 48 h. Specifically, the  
44 transcription levels of IL-1 $\beta$  and inducible nitric oxide synthase (iNOS), two well-established  
45 markers of proinflammatory macrophages, are increased more than 10 folds in LPS stimulated  
46 M1 macrophages compared to that of IL-4 stimulated M2 macrophages. In contrast, the  
47 transcriptions of IL-10 and transforming growth factor beta (TGF $\beta$ ), two characterized pro-  
48 healing macrophage markers, are significantly higher in M2 macrophages, compared to that of  
49 M1 macrophages (**S1 Fig. (E)**). Thus, we have generated and polarized primary macrophages  
50 with characterized phenotypes that are applicable and appropriate for the proposed downstream  
51 studies and analysis.

## 52 **Shape modeling with principal component analysis**

53 Phase contrast images of M0, M1 and M2 macrophages were converted into the binary images  
54 using custom written Matlab code (Script available upon request). Briefly, we used Matlab edge  
55 detection and a basic morphology function to outline the cells in the phase contrast image. We

56 use the Otsu method (47) to erase the halo artifacts. If shape was still unsatisfactory, we then  
57 used the Lasso tool in Photoshop (Adobe) to manually extract the cell shape. For principal  
58 component analysis, polygons were extracted from the binary images and mutually aligned using  
59 Celltool (28), an open software source. Principle modes of shape variation were determined by  
60 principal component analysis of the population of polygonal cell outlines and scaled in terms of  
61 the standard deviation of the population for each mode of variation, which was detailed  
62 previously (48). To identify the existing principal shape modes, we consider each cell in every  
63 frame of the time-lapse datasets as individual data points ( $n = 2329$  cells). We obtain the shape  
64 information for M0 ( $n = 965$  cells), M1 ( $n = 698$  cells) and M2 ( $n = 666$  cells) (**S3 Fig. (B)**).  
65 These segmentations are not used in downstream analysis.

## 66 **Preliminary Motility Analysis**

67 We use the Gaussian process regressor model from the Scikit-learn python library (32) to plot  
68 the speed and persistence of the cells. We found that the speed of the cells in the M1 image is  
69 highest, followed by the speed of the cells in M2 and the lowest speed observed for the cells in  
70 M0 (**S6 Fig. (A)**). In contrast, the persistence of the cells in M2 is highest, followed by the  
71 persistence of the cells in M0 and the lowest persistence observed for the cells in M1 (**S6 Fig.**  
72 **(B)**). Based on this motility parameter analysis, we conclude that:

- 73 • M0 cells move slower and stay close to their initial time frame position.
- 74 • M1 cells move faster but still stay close to their initial time frame position.
- 75 • M2 cells move slower but reach farther away from their initial time frame position.

76

77 To better visualize and quantify the motility of the cells in M0, M1 and M2 images, we perform  
78 quadratic discriminant analysis on the median of the cells speed and persistence along its time  
79 series and plot them. This analysis provides a binary classification based on two input features  
80 (**S6 Fig.**, showing the results for various pairs of classification labels). Classification accuracy  
81 percentages show that the cells in M1 image can be distinguished combined or independently  
82 from M0 and M2 cells using the speed and persistence motility parameters (**S4 Figs. (C), (D),**  
83 **(F)**). Notably, the classification accuracy percentage between M0 and M2 cells is comparatively  
84 lower around 63%, suggesting that it is comparatively difficult to classify M0 cells from M2  
85 cells (**S6 Fig. (E)**).
