# Supplementary material for: A data-driven approach to establishing cell motility patterns as predictors of macrophage subtypes and their relation to cell morphology
Source: PubMed Central journal article supplement (PMC11687909; doi:10.1371/journal.pone.0315023), 2024-12-31
Supplement: pone.0315023.s009.pdf [file pone.0315023.s009.pdf]

**Table S1. Macrophage subtype classification with accuracy percentages for different analysis techniques used in the study**

| <b>Input parameters</b>      | <b>Method</b>         | <b>M0</b>  | <b>M1</b>  | <b>M2</b>  |
|------------------------------|-----------------------|------------|------------|------------|
| Morphology                   | K-means<br>Clustering | 38%        | 52%        | 46%        |
| Morphology                   | SVM                   | 69%        | 71%        | 71%        |
| Motility                     | SVM                   | 75%        | 75%        | 41%        |
| <b>Morphology + Motility</b> | SVM                   | <b>81%</b> | <b>79%</b> | <b>79%</b> |
