# Supplementary material for: A data-driven approach to establishing cell motility patterns as predictors of macrophage subtypes and their relation to cell morphology
Source: PubMed Central journal article supplement (PMC11687909; doi:10.1371/journal.pone.0315023), 2024-12-31
Supplement: pone.0315023.s010.pdf [file pone.0315023.s010.pdf]

**Table S2: Target genes and primers used in q-PCR.**

| <b>Target gene</b> | <b>Forward primers (5'-3')</b> | <b>Reverse primers (5'-3')</b> | <b>Macrophage Subtypes</b> |
|--------------------|--------------------------------|--------------------------------|----------------------------|
| Arg-1              | CGTTGTATGATGCACAGCCG           | CCCCACCCAGTGATCTTGAC           | M1                         |
| CD206              | G TTCACCTGGAGTGATGGTTCTC       | AGGACATGCCAGGGTCACCTTT         | M2                         |
| CD31               | ACAGAGCCAGCAGTATGA             | AATGACAACCACCGCAAT             | Angiogenesis               |
| CXCL10             | GATGGATGGACAGCAGAG             | GGAAGATGGTGGTAAAGTTC           | M1                         |
| Adgre1             | TCTGGGGAGCTTACGATGGA           | GAATCCC GCAATGATGGCAC          | Macrophage                 |
| Fizz-1             | CCTGCTGGGATGACTGCTACT          | AGATCCACAGGCAAAGCCAC           | M2                         |
| GAPDH              | TCTCCTGCGACTTCAACA             | TGTAGCCGTATTCATTGTCA           | Housekeeping               |
| IL-10              | CAGAGCCACATGCTCCTAGA           | TGTCCAGCTGGTCCTTTGTT           | M2                         |
| IL-12p40           | TGGTTTGCCATCGTTTTGCTG          | ACAGGTGAGGTTCACTGTTTCT         | M1                         |
| IL-1 $\beta$       | GTGCAAGTGTCTGAAGCAGC           | CAAAGGTTTGGAAGCAGCCC           | M1                         |
| IL-6               | GGAGTCACAGAAGGAGTGGC           | CGCACTAGGTTTGCCGAGTA           | M2                         |
| <u>iNOS</u>        | GTTCTCAGGCCAACAATACAAGA        | GTGGACGGGTCGATGTCAC            | M1                         |
| MCP-1              | AGCCAACTCTCACTGAAGCC           | GGACCCATTCCTTCTTGGGG           | M1                         |
| MMP-9              | CTGGACAGCCAGACACTAAAG          | CTCGCGGCAAGTCTTCAGAG           | M2 MMP                     |
| PPAR- $\gamma$     | TCCTGTAAAAGCCCGGAGTAT          | GCTCTGGTAGGGGCAGTGA            | M2 Metabolic               |
| Stat3              | CTTGTCTACCTCTACCCCGACAT        | GATCCATGTCAAACGTGAGCG          | M1 TF                      |
| Stat6              | TGAGGTGGGGACCAGCCGG            | GTGACCAGGACACACAGCGG           | M2 TF                      |
| TGF- $\beta$ 1     | TGGAGCAACATGTGGA ACTC          | CAGCAGCCGGTTACCAAG             | M2                         |
| TLR4               | CAGAACAATAGAAGAGGAAGAC         | GGCACTAACCACATAGAGAA           | M1                         |
| TNF- $\alpha$      | GACGTGGA ACTGGCAGAAGA          | ACTGATGAGAGGGAGGCCAT           | M1                         |
| Ym-1               | CTCACTTCCACAGGAGCAGG           | AGCTGCTCCATGGTCCTTC            | M2                         |
| $\beta$ -actin     | GGCTGTATTCCCCTCCATCG           | CCAGTTGGTAACAATGCCATGT         | Housekeeping               |
